# Supplementary material for: Evolutionary cancer-favoring engineered vaccinia virus for metastatic hepatocellular carcinoma
Source: PubMed Central journal article supplement (PMC5641064; doi:10.18632/oncotarget.17288), 2017-04-20
Supplement: oncotarget-08-71489-s001.pdf [file oncotarget-08-71489-s001.pdf]

## Evolutionary cancer-favoring engineered vaccinia virus for metastatic hepatocellular carcinoma

### Supplementary Materials

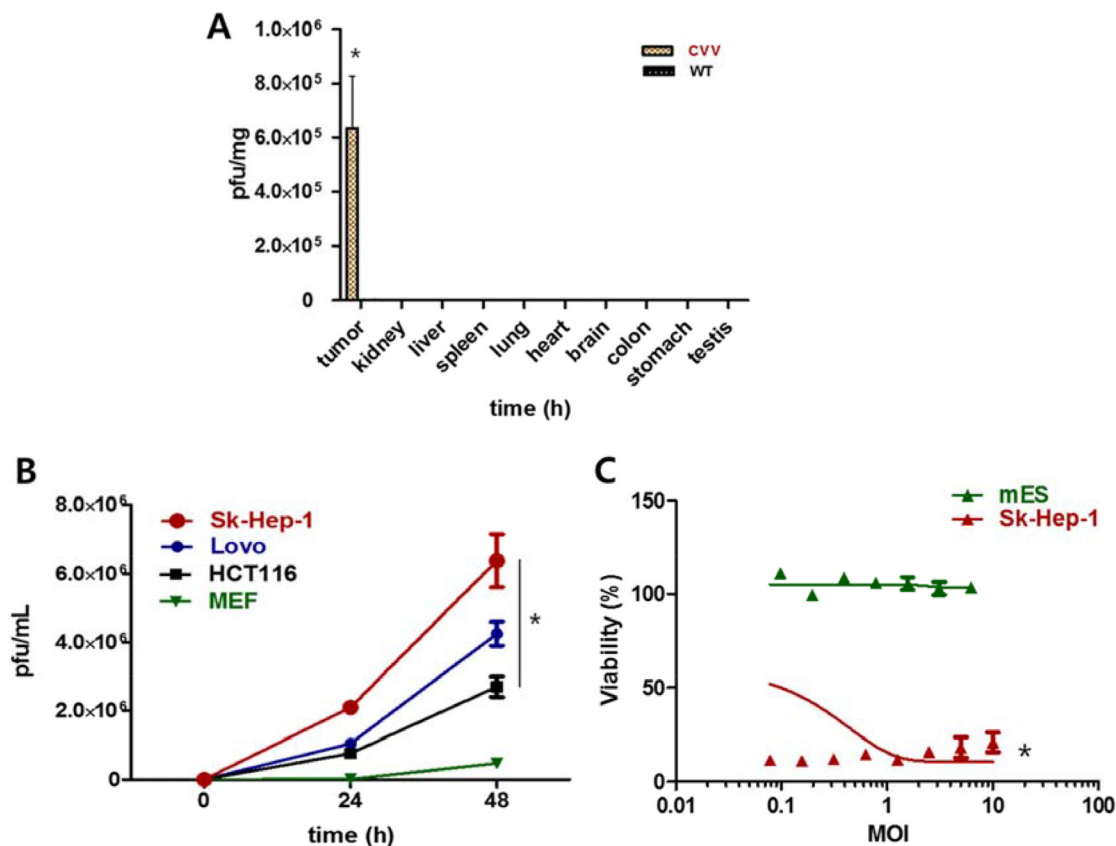

**Supplementary Figure 1: Cancer favoring affinity of CVV.** (A) Biodistribution results at 2 weeks post-intraperitoneal injection of virus in HT29-bearing mice, showing that CVV selectively infected tumor masses. ( $*p < 0.0001$ ). (B) Higher replication efficacy in cancer cells (Sk-Hep-1: human hepatocellular carcinoma cells, Lovo & HCT116: human colon cancer cells) than in normal cells (MEF: mouse embryonic fibroblast cells) ( $*p < 0.0001$  vs MEF). (C) Cytotoxicity results of CVV on normal mouse embryonic stem cells (mES) vs human hepatocellular carcinoma, Sk-Hep-1 ( $*p < 0.0001$  vs mES).
